# Supplementary material for: Enhancing Stoma Care Quality: Implementing a PDSA Cycle-Based Program for Colorectal Cancer Patients
Source: Research Square preprint supplement (doi:10.21203/rs.3.rs-4371901/v1), 2024-05-23
Supplement: Supplementary file 1 [file 0d83bc4112d4ebed1ce5b696.xlsx]

## Sheet: Table 5
		Intervention Group | Cycle | Phase | Role | Actions/Activities |
			Table 5 Lessons learned from QSPSP program utilizing PDSA
			Root causes	What is needed/ expected	What is the landing/ approach
			Unexpected long length of stay in hospital because of the delayed initial stoma nursing specilist visit. It was resulted from absence of communication and proactive plan for stoma care (e.g., over the weekend).	Appropriate initial nurse visit	Improve the efficency of perfomance scores
			Complaint of unavailibility of primary and specilist care in stoma right after postoperative time	Consider to refine documentation and professional input	Not only addressing stoma nursing specilist, but also the detail of management fo patients perceive the role of the primary care team
			Loss of compliance with protocols in the middle/late postoperative phase and difficulties in changing nursing practice.	Coordinating care	Ensure the responsibility of the staff; Supply timely stoma spercific intervention; Ensure documentation of the postoperative care package
			Occurances of anastomotic leak due to other comorbidities e.g., diabetes, and vascular disease. Or advanced stage.	Improving patient's self-care education Ensure proper communication	Conduct education session timely for patients and PCA as well as members of family Closely monitor the potential risk due to hospital records
			Low patients’ stoma self-efficacy.	More effective in patients' self-management of their stoma and better prepared to care for themselves upon discharge from the hospital to prevent complications and improve outcomes	Improve communication between patients (and their family members) and QSPSP team members; Initiate education perioperatively with clear and standardized paper/electronic materials
