# Supplementary material for: Enhancing Stoma Care Quality: Implementing a PDSA Cycle-Based Program for Colorectal Cancer Patients
Source: Research Square preprint supplement (doi:10.21203/rs.3.rs-4371901/v1), 2024-05-23
Supplement: Supplementary file 2 [file 3f7333df74528774dded1d04.xlsx]

## Sheet: Table 4
			Table 4. Bivariate Analyses of QLQ-C30 scales among patients with stoma (n=106) resulted after QSPSP program
			Variables	Ref. values (± SD)	Mean ± SD in study	Rank value in ref.	Rank value in study	Z	P values
			Functional scales
			Physical function	83.9 ± 16.1	75.1 ± 12.9	322.9	21994	2.11	0.014
			Role function	76.1 ± 11.9	72.2 ± 18.3	933.2	829.2	2.22	0.019
			Emotional function	89.1 ± 12.7	70.3 ± 13.2	933.2	699.1	3.44	0.01
			Cognitive function	82.5 ± 14.9	80.1 ± 17.4	977.1	902.1	1.99	0.05
			Social function	85.5 ± 13.8	79.3 ± 17.9	922.1	896.5	1.33	0.07
			Symptom scales
			Fatigue	43.2 ± 30.2	42.4 ± 32.1	905.5	942.1	-1.14	0.21
			Nausea/vomiting	6.2 ± 9.9	19.1 ± 12.5	922.4	991.2	-1.19	0.19
			Pain	32.1 ± 22.1	32.3 ± 22.1	910.2	916.2	-1.99	0.058
			Dyspnea	14.3 ± 12.3	19.4 ± 11.6	952.4	953.3	-1.19	0.2
			Diarrhea	16.8 ± 10.4	22.3 ± 19.0	939.6	1049.5	-2.36	0.009
			Appetite loss	11.1 ± 12.8	28.4 ± 22.9	930.8	1004.4	-3.22	0.009
			Constipation	10.9 ± 12.2	14.1 ± 14.1	955.2	1100.9	-2.66	0.006
			Insomnia	32.1 ± 11.2	33.2 ± 24.7	909.7	988.4	-2.29	0.01
			Financial difficulties	13.8 ± 15.9	17.1 ± 19.3	929.8	939.5	-1.19	0.39
			Global health status	75.9 ± 17.8	62.7 ± 19.9	922.9	811.5	3.118	0.001
