# Supplementary material for: Enhancing Stoma Care Quality: Implementing a PDSA Cycle-Based Program for Colorectal Cancer Patients
Source: Research Square preprint supplement (doi:10.21203/rs.3.rs-4371901/v1), 2024-05-23
Supplement: Supplementary file 3 [file a224ce910215b879238ecd8f.xlsx]

## Sheet: Table 3
							Table 3 QSPSP program and PDSA cycles and stages
							Cycle	Stage	Aim and steps	Key points	Performance of the program
							1st Two Weeks pre-operation
							Assessment & Planning	Quality stoma practice specific program round with the aim of acheving a 78% score to be eligible for QSPSP certification
								Plan	Build and reformulate multidisciplinary	The QSPSP team representative of all quality care	Establish a multidisciplinary team, including special nurses, personal care aides, and oncologists, to collaborate on the intervention.
									Establish scope and goals	Action plan and role's assignment	Identify the primary goals of the stoma care intervention, such as improving stoma care outcomes, enhancing patient satisfaction (e.g., “an ostomy is a surgical procedure for the diversion of bowel”, “may change the way the person internalizes their body image and self-concept”, and “No necessary to accept it as the lesser of two evils, or refuse to acknowledge its existence, or may hold onto the…
									Define the measurements	Different types for the measurements	Decrease in stoma-related infections by 20% within one months.
									Consider potential improvement modules	Cause and effect analysis	Implement the intervention in a selected group of patients with colorectal cancer who have undergone stoma surgery.
							Intervention Group | Cycle | Phase | Role | Actions/Activities |	Do	Enhance the function of the care team	Regular meeting	Provide training and education to healthcare professionals involved in stoma care.
									Record the qualitative/quantitiative data	Basine data and progressive concerns	Develop a comprehensive stoma care plan, taking into account the individual needs of each patient.
								Study	Detailed analysis of raw data	Identify main trends	Analyze the data to assess the effectiveness of the intervention and identify areas for improvement.
									Evaluate the feedback and results	Seek the potential weakness	Collect data on stoma care outcomes, patient experiences, and any complications or issues encountered during the initial implementation.
								Act	Adjust and modify	Discern correctable casues	Adjust the stoma care plan based on the findings from the initial implementation, considering feedback from patients and healthcare providers. Implementation of a patient-centered, self-care–oriented postoperative education checklist was suggested because of a reduction of readmission after ileostomy creation. For example, a consultant towards to living a new reality for the patient's question " …
									Conduct an extensive consultant	Present modified guidance and recommendation	Share the results and lessons learned from the first cycle with the healthcare team and make necessary modifications to the intervention plan. Patient should be suggested an understanding that they do not have to tell everyone about the surgery and can be their decision to select who and how much to tell. It may be only to family member who will be supportive throughout the rehabilitation process…
											Prepare for the second cycle, incorporating the improvements and changes identified in the initial assessment.
									Table 3		continued
							Cycle	Stage	Aim and steps	Key points	Performance of the program
							2nd One Week post-operation
							Implementation & Refinement	To improve overall practice perfromance score to achieve 80%
								Plan	Recreate documentation		Build on the lessons learned from Cycle 1 to refine the stoma care intervention.
									Record the extensive consultant	Potential expanding the intervention	Set new goals or adjust existing ones to further enhance patient outcomes and experiences. Knowing how each food affects patient's digestion and encourage him less worrying about the food's effects and more time having fun with friends.
								Do	Specific education for hand-on talk	Well-prepared and informed of courses	Implement the refined stoma care intervention in a larger patient population, ensuring all healthcare team members are accessible.
								Study	Review the results of measurement for score and analyze the data to identify trends	Refined intervention on stoma care outcomes	Continue data collection to evaluate the impact and assess whether the intervention is meeting the revised objectives.
								Act	Readjust the version of care program	Share the findings and modifications	Based on the results of Cycle 2, make necessary adjustments and improvements to the intervention, considering feedback from patients and healthcare providers. For example, the patient may ask "I feel fear and intense anguish during that time. It was like going to war, entering a battlefield, and carrying a permanent scar that reminders of that moment every day.", " How to make the partner aware o…
									Table 3		continued
							Cycle	Stage	Aim and steps	Key points	Performance of the program
							3rd One Week post-operation
							Consolidation and Optimization	Confrim the care procedure and start a new change
								Plan	Address the logistic requirements	Reassess goals and objectives	Consolidate the knowledge and experience gained from the previous cycles to optimize the stoma care intervention further.
									Establish comprehensive care action	Sustain improvement in stoma care
							Intervention Group | Cycle | Phase | Role | Actions/Activities |	Do	File the standard into the management system	Consider new insights gained from the earlier cycles.	Implement the optimized stoma care intervention in a new-recuited patient.
								Study	Suevery from team members and patient	Continue data collection and analysis	Evaluate the long-term effects on patient outcomes and experiences.
								Act	Report the correct plan with agreement	Determine the sustained impact of the optimized intervention.	Review the results of Cycle 3 and make final adjustments to the stoma care intervention. Develop a plan for ongoing monitoring and improvement to ensure the continued success of the intervention. Establishment of the new stoma self-management training associated with QSPSP intervention was based on practical experience. During homecare period, the combined intervention was induced one-hour telehe…
