# Supplementary material for: Enhancing Stoma Care Quality: Implementing a PDSA Cycle-Based Program for Colorectal Cancer Patients
Source: Research Square preprint supplement (doi:10.21203/rs.3.rs-4371901/v1), 2024-05-23
Supplement: Supplementary file 4 [file b88539b2ce8dc8e9d0cab651.xlsx]

## Sheet: Table One
			Table 1. Sociodemographic characteristics among postoperative survivors with stoma at the time of primary operation for cancer (n=106)
			Characteristics	Study groups (n (%))
			Sex
			Male	69 (65.1)
			Female	37 (34.9)
			Age at the operatiuon
			<50	9 (8.5)
			50-59	42 (39.6)
			60-69	39 (36.8)
			70-79	11 (10.4)
			≥80	5 (4.7)
			BMI (kg/m2)
			<20	17 (16.0)
			20-30	78 (73.6)
			>30	10 (9.4)
			Ethnicity
			Han	96 (90.6)
			Other	10 (9.4)
			Marital status
			Married	75 (70.8)
			divorced or widow	10 (9.4)
			Live alone	6 (5.7)
			Live with family	15 (14.1)
			Family social class
			I	2 (1.9)
			II	20 (18.9)
			III	36 (34.0)
			IV	38 (35.8)
			V	10 (9.4)
			Insurance status
			Adequate covered	25 (23.6)
			medium covered	69 (65.1)
			Completely self-reliable	12 (11.3)
			Religious practice
			No religious belief	79 (74.5)
			Buddhism	13 (12.3)
			Ancestor wroship	9 (8.5)
			Christian	5 (4.7)
			Education
			≤ Elementary	10 (9.4)
			<High school	28 (26.4)
			≥High school	50 (47.2)
			College or above	18 (17.0)
