# Supplementary material for: Enhancing Stoma Care Quality: Implementing a PDSA Cycle-Based Program for Colorectal Cancer Patients
Source: Research Square preprint supplement (doi:10.21203/rs.3.rs-4371901/v1), 2024-05-23
Supplement: Supplementary file 5 [file d7e417ba6b800aaba9876b71.xlsx]

## Sheet: Table 2
		Table 2. Clinical stoma-related characteristics among postoperative survivors (n=106)
		Characteristics	Study groups (n (%)) or mean (± SD)
		Tumor site
		Left colon	42 (39.6)
		Rectum	39 (36.8)
		Right colon	11 (10.4)
		unspecified colon	9 (8.5)
		unknown	5 (4.7)
		Histologic diagnosis
		Adenocarcinoma	92 (86.8)
		Others	14 (13.2)
		Dukes' stage
		A	18 (17.0)
		B	78 (73.6)
		C	10 (9.4)
		ASA
		I	20 (18.9)
		II	79 (74.5)
		III	7 (6.6)
		Tumor length (IQR)#	4.2 (2.7-6.5)
		Type of surgical accessment
		Abdominoperineal resection	67 (63.2)
		Sigmoid	17 (16.8)
		Low anterior resection	22 (21.0)
		Type of surgery
		Open surgery	61 (57.5)
		Laparoscopy	45 (42.5)
		Extent of surgery
		Radical	96 (91.0)
		Non-radical	10 (9.0)
		Distance from incisors (IQR) (cm)	5.1-6.2
		Duration of operation (minute)	91 ± 31
		Blood loss (ml)	98 ± 29
		Radiotherapy
		Preoperative	88 (83.1)
		Postoperative	81 (76.4)
		Chemotherapy	92 (86.8)
		Type of stoma
		Separated	79 (74.5)
		Loop	27 (25.5)
		Location
		Descending	69 (65.1)
		Sigmnoid	25 (23.6)
		Transcerse	12 (11.3)
		Status of stoma
		Permanent	15(14.2)
		Temporary	91 (85.8)
		#, interquartile range.
